# Supplementary material
Source: HighWire-hosted journal article supplement (https://tobaccocontrol.bmj.com/content/31/2/187)
Supplement: inline-supplementary-material-1 [file inline-supplementary-material-1.pdf]

Supplement Table

|    | Countries               | Tobacco control law that regulate WTS                                                                                                                                                                                                                                                                                                          |
|----|-------------------------|------------------------------------------------------------------------------------------------------------------------------------------------------------------------------------------------------------------------------------------------------------------------------------------------------------------------------------------------|
| 1  | Afghanistan $\alpha$    | - Tobacco Control Law (2015)<br>- Amendment (2018)<br>- Notice (2016) - use tobacco product                                                                                                                                                                                                                                                    |
| 2  | Algeria $\alpha$        | - Not regulated                                                                                                                                                                                                                                                                                                                                |
| 3  | Argentina *             | - Decree 602/2013                                                                                                                                                                                                                                                                                                                              |
| 4  | Australia               | - Not regulated                                                                                                                                                                                                                                                                                                                                |
| 5  | Azerbaijan $\alpha$     | - Law On Advertising (2015)<br>- Law No. 887-VQ (2017) on Restriction of Tobacco Use<br>- DECISION No. 127 (2018) "Specially Designated Places for Tobacco Usage and Disposal"                                                                                                                                                                 |
| 6  | Bahrain $\alpha$        | - Decision Number 16 (2012): Adopting the Standardized Gulf Technical Regulation Regarding Labeling of Tobacco Product Packs as a National Technical Regulation                                                                                                                                                                                |
| 7  | Belize $\alpha$         | - Not regulated                                                                                                                                                                                                                                                                                                                                |
| 8  | Bangladesh              | - Not regulated                                                                                                                                                                                                                                                                                                                                |
| 9  | Bhutan                  | - Not regulated                                                                                                                                                                                                                                                                                                                                |
| 10 | Brazil $\infty$         | - DECREE N. 8.262 (2014) amending law: Governs restrictions on the use and advertising of smoking products<br>- ANVISA Resolution No. 195(2017): Regulations concerning packaging and health warnings for smoking products derived from tobacco.                                                                                               |
| 11 | Brunei                  | - Not regulated                                                                                                                                                                                                                                                                                                                                |
| 12 | Bulgaria $\alpha$       | - DECREE No 89 (2016)                                                                                                                                                                                                                                                                                                                          |
| 13 | Burkina Faso            | - Not regulated                                                                                                                                                                                                                                                                                                                                |
| 14 | Canada                  | - Not regulated                                                                                                                                                                                                                                                                                                                                |
| 15 | Chad $\infty$           | - Order No. 420 (2020)- Regulating the Packaging and Labeling of Tobacco Products in the Republic of Chad                                                                                                                                                                                                                                      |
| 16 | Chile                   | - Not regulated                                                                                                                                                                                                                                                                                                                                |
| 17 | China $\alpha$          | - Not regulated                                                                                                                                                                                                                                                                                                                                |
| 18 | Colombia                | - Not regulated                                                                                                                                                                                                                                                                                                                                |
| 19 | Costa Rica              | - DECREES (2012) N° 37185-S-MEIC-MTSS-MP-H-SP regulation of the general law for the control of tobacco and its harmful effects on health                                                                                                                                                                                                       |
| 20 | Cuba $\alpha$           | - Not regulated                                                                                                                                                                                                                                                                                                                                |
| 21 | Czech Republic $\alpha$ | - Act No. 100/1997 Amended 2016<br>Decree No. 261/2016                                                                                                                                                                                                                                                                                         |
| 22 | Ecuador                 | - The Regulation to the Tobacco Regulation and Control Act, No. 1047 (2012)<br>Decision No. 407 (2012) on Approved Health Warnings                                                                                                                                                                                                             |
| 23 | Egypt **                | - Law Nb 13 (2020) amending some articles related to tobacco taxation                                                                                                                                                                                                                                                                          |
| 24 | England                 | - Directive 2014/40/EU of the European parliament and of the council of 3 April (2016)<br>- The Tobacco and Related Products Regulations 2016 (2016)<br>- COMMISSION IMPLEMENTING REGULATION (EU) 2018/574 of 15 December 2017 (2017) on technical standards for the establishment and operation of a traceability system for tobacco products |
| 25 | Estonia $\alpha$        | - Tobacco Act 2005 amended 2020                                                                                                                                                                                                                                                                                                                |
| 26 | France $\infty$         | - Order n° 2016-623 (2016), concerning transposition of Directive 2014/40/UE on the manufacture, display and sale of tobacco products and related products                                                                                                                                                                                     |
| 27 | Ghana                   | - Not regulated                                                                                                                                                                                                                                                                                                                                |

|    |                          |                                                                                                                                                               |
|----|--------------------------|---------------------------------------------------------------------------------------------------------------------------------------------------------------|
| 28 | Germany $\alpha$         | - Not regulated                                                                                                                                               |
| 29 | Guatemala                | - Not regulated                                                                                                                                               |
| 30 | Honduras                 | - Not regulated                                                                                                                                               |
| 31 | Honk Kong                | - Not regulated                                                                                                                                               |
| 32 | Iceland                  | - Not regulated                                                                                                                                               |
| 33 | India                    | - Act No. 34 of (2003)                                                                                                                                        |
| 34 | Indonesia                | - Not regulated                                                                                                                                               |
| 35 | Iran $\alpha$            | - Not regulated                                                                                                                                               |
| 36 | Iraq $\alpha$            | - Anti-Smoking Act No. 19 (2012)<br>- Decree No. 4318- Directive facilitating implementation of the Smoking Control (2014)                                    |
| 37 | Ireland $\infty$         | - Regulations (2016)                                                                                                                                          |
| 38 | Jamaica                  | - Not regulated                                                                                                                                               |
| 39 | Japan                    | - Not regulated                                                                                                                                               |
| 40 | Jordan                   | - Tobacco and Tobacco Products - Tobacco Molasses (Meassel) (2014) a draft not official document                                                              |
| 41 | Kenya $\infty$           | - Public Health Rules, (2017) (Control of Shisha Smoking)                                                                                                     |
| 42 | Lebanon                  | - Law 174 (2011)<br>- Decree No. 8991 (2012)                                                                                                                  |
| 43 | Laos $\alpha^*$          | - Not regulated                                                                                                                                               |
| 44 | Libya $\alpha$           | - Not regulated                                                                                                                                               |
| 45 | Macau                    | - Not regulated                                                                                                                                               |
| 46 | Madagascar               | - Not regulated                                                                                                                                               |
| 47 | Malaysia                 | - Not regulated                                                                                                                                               |
| 48 | Mauritius                | - The Public Health (2008) (Restrictions on Tobacco Products) Regulations                                                                                     |
| 49 | Mexico                   | - Not regulated                                                                                                                                               |
| 50 | Moldova $\alpha$         | - Not regulated                                                                                                                                               |
| 51 | Namibia *                | - Tobacco Products Control Act of 2010                                                                                                                        |
| 52 | Netherlands $\alpha$ *** | - Decree of May 4, 2016                                                                                                                                       |
| 53 | Nepal                    | - Not regulated                                                                                                                                               |
| 54 | New Zealand              | - Not regulated                                                                                                                                               |
| 55 | Niger $\infty$           | - Order No. 081 of October 9, (2017) Prohibiting the Import Distribution and Sale of Shisha or Hookah                                                         |
| 56 | Nigeria $\alpha$         | - National Tobacco Control Regulations (2019)                                                                                                                 |
| 57 | Norway $\infty$          | - Law amending the Tobacco Control Act 2017 (2017) (implementation of Directive 2014/40/EC and standardised tobacco packs)                                    |
| 58 | Pakistan $\infty$        | - The Federal Excise Act 2005<br>- 2005SRO 128(KE) (2017) amends SRO 23(KE)/2015                                                                              |
| 59 | KSA $\alpha$             | - The Royal Decree No. 56(2015) Decision of the Minister of Health No. 1853515 on 29/12/ 1439 AH<br>- SFDA.FD 60: (2018): Plain Packaging of Tobacco Products |
| 60 | Panama $\infty$          | - Ministry of Health Resolution No. 0554 (2018)                                                                                                               |
| 61 | Peru                     | - Not regulated                                                                                                                                               |
| 62 | Philippines $\infty$     | - Executive Order No. 26 of 2017 regulates designated smoking areas (DSAs)                                                                                    |
| 63 | Poland                   | - The Act of November 9,1995 -includes amendments through February 20, (2015).                                                                                |
| 64 | Portugal $\alpha$        | - Law No. 37(2007)<br>- Decree No. 6 (2016)<br>Law No. 63 (2017)                                                                                              |
| 65 | Rwanda $\alpha$          | - Public Notice re Shisha (2017)                                                                                                                              |

|    |                    |                                                                                                                                                                                                                                                                                                                                                                |
|----|--------------------|----------------------------------------------------------------------------------------------------------------------------------------------------------------------------------------------------------------------------------------------------------------------------------------------------------------------------------------------------------------|
| 66 | Russia ∞           | - Law No. 38-FZ (2006)<br>- Reg. No. 268 (2008)<br>- Amdts. to Offences Code (2013)<br>- EEC Tech. Regs. (2014)<br>- No. 303-FZ on Nicotine Products (2020)                                                                                                                                                                                                    |
| 67 | Scotland∞          | - No. 507 CONSUMER PROTECTION the Tobacco and Related Products Regulations 2016 (2016)                                                                                                                                                                                                                                                                         |
| 68 | Serbia α           | - SF Law 2010 (2010)                                                                                                                                                                                                                                                                                                                                           |
| 69 | Seychelles         | - Not regulated                                                                                                                                                                                                                                                                                                                                                |
| 70 | Singapore          | - Prohibited Products Regs - national (2014)<br>- Prohibited Products Exemption Regs - national (2014)                                                                                                                                                                                                                                                         |
| 71 | Slovakia α         | - Act No. 89_2016 (2016)                                                                                                                                                                                                                                                                                                                                       |
| 72 | Slovenia α         | - TC Act 2017 (2017)                                                                                                                                                                                                                                                                                                                                           |
| 73 | South Africa *     | - Tobacco Products Control Act - national No. 9 of 2016 (1993, last amended in 2008)                                                                                                                                                                                                                                                                           |
| 74 | Spain              | - Not regulated                                                                                                                                                                                                                                                                                                                                                |
| 75 | Sri Lanka          | - Not regulated                                                                                                                                                                                                                                                                                                                                                |
| 76 | Sweden∞            | - HSLF-FS 201646 (2016)<br>- HSLF-FS 201677 (2016)                                                                                                                                                                                                                                                                                                             |
| 77 | Syria α            | - MoH Report on 2008 FCTC Activities (2009)<br>Legislative Decree No. 62 (2009)                                                                                                                                                                                                                                                                                |
| 78 | Taiwan             | - Ban on Hookah, E-Cigs (2014)<br>- Consumer Protection Board Order No. 9_2015 (2015)                                                                                                                                                                                                                                                                          |
| 79 | Tanzania           | - Not regulated                                                                                                                                                                                                                                                                                                                                                |
| 80 | Thailand           | - Not regulated                                                                                                                                                                                                                                                                                                                                                |
| 81 | Togo               | - Not regulated                                                                                                                                                                                                                                                                                                                                                |
| 82 | Tunis α            | - Not regulated                                                                                                                                                                                                                                                                                                                                                |
| 83 | Turkey ∞           | - Law No. 4207 (1996- amended 2018)<br>- Law No. 4733 (2002)<br>- Law No. 25692 (2005)<br>- Regs on Pres. & Sale (2011)<br>- Amdts. to Regs on Pres. & Sale (2013)<br>- Regs on Hookah Businesses (2013)<br>- Circular 2009_13 (2019)<br>- Law No. 6487 (2013)<br>- Plan of Action (2015-2018) (2015)<br>- 2019 Regs (, 2019)<br>- Reg Amd'ing 2019 Reg (2019) |
| 84 | UAE α              | - UAE.S_GSO 2462011 (2011)<br>- No. 24_2013, TC Regs (2013)                                                                                                                                                                                                                                                                                                    |
| 85 | Uganda α           | - TCA - national (2015)                                                                                                                                                                                                                                                                                                                                        |
| 86 | Ukraine            | - Law No. 4844, SF Amdts. (2012)                                                                                                                                                                                                                                                                                                                               |
| 87 | Northern Ireland ∞ | - No. 507 CONSUMER PROTECTION the Tobacco and Related Products Regulations 2016. (2016)                                                                                                                                                                                                                                                                        |
| 88 | Uruguay            | - Not regulated                                                                                                                                                                                                                                                                                                                                                |
| 89 | Viet Nam           | - 2009 FCTC Implementation Plan (2009)<br>- 2012 TC Law (2013)<br>- Viet Nam - Decree No. 67_2013 (2013)                                                                                                                                                                                                                                                       |
| 90 | Yemen α            | - Law No. 26_2005 (2005)<br>- Dec. No. 379, 2013 Bylaw (2013)<br>- Yemen - GCC GSO 246_2011 (2011)                                                                                                                                                                                                                                                             |
| 91 | Wales ∞ (*)        | - No. 507 CONSUMER PROTECTION the Tobacco and Related Products Regulations 2016 (2016)<br>- Smoke-free law: guidance on the changes from March (2021)                                                                                                                                                                                                          |
|    |                    | 91                                                                                                                                                                                                                                                                                                                                                             |

∞: updated with amendment since 2015 paper; α: new policy since 2015 paper; \* excluded from further analysis as they define waterpipe as device and do not regulate it in their policies ; \*\* this law was not available of the TFK and was extracted from the WHO EMRO page; \*\*\*excluded as the decree is in Dutch, \*\*\*\* Wales, Scotland, Northern Ireland has an exit of the EU document , (\*) was extracted from: <https://gov.wales/smoke-free-law-guidance-changes-march-2021-html#section-58217>
